# Supplementary material for: New approach for SANS measurement of micelle chain mixing during size and morphology transitions
Source: Royal Society of Chemistry journal article supplement (doi:10.1039/d3sm00157a), 2023-01-01
Supplement: d3sm00157a1.pdf [file d3sm00157a1.pdf]

## New Approach for SANS Measurement of Micelle Chain Mixing During Size and Morphology Transitions

Taylor Larison<sup>1</sup>, Sai Venkatesh Pingali<sup>2</sup> and Morgan Stefik<sup>1\*</sup>

<sup>1</sup>Department of Chemistry and Biochemistry, University of South Carolina, Columbia, South Carolina 29208, United States

<sup>2</sup>Neutron Scattering Division, Oak Ridge National Laboratory, Oak Ridge, Tennessee 37831, United States

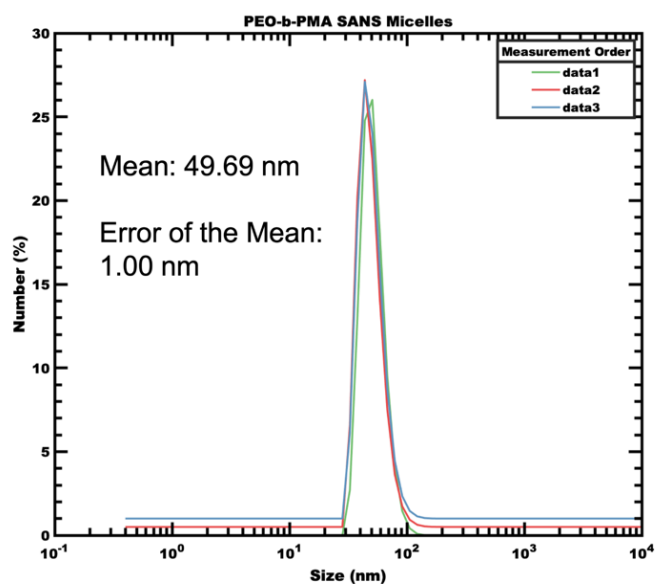

**Figure S1.** DLS data of PEO-b-PMA micelles in MeOD/H<sub>2</sub>O solution.

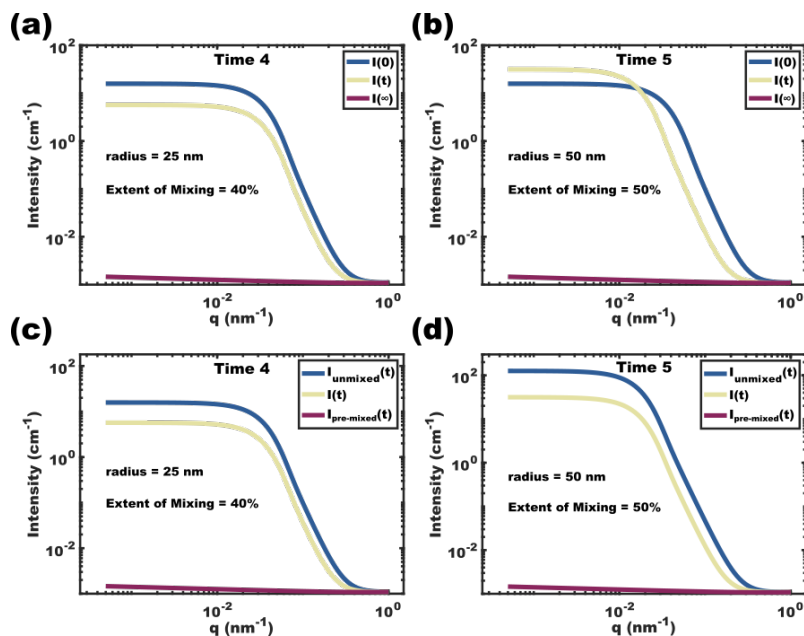

**Figure S2.**  $I$  vs  $q$  scattering curves for scenario 1S for time steps 4 and 5. The  $R(t)$  method is appropriate for Time step 4 (a) but reveals a flaw with intersecting curves for time step 5 (b) due to comparison to a reference pattern with a changed size. The  $SRR(t)$  method rather uses appropriate reference patterns for both Time step 4 (c) and 5(d).

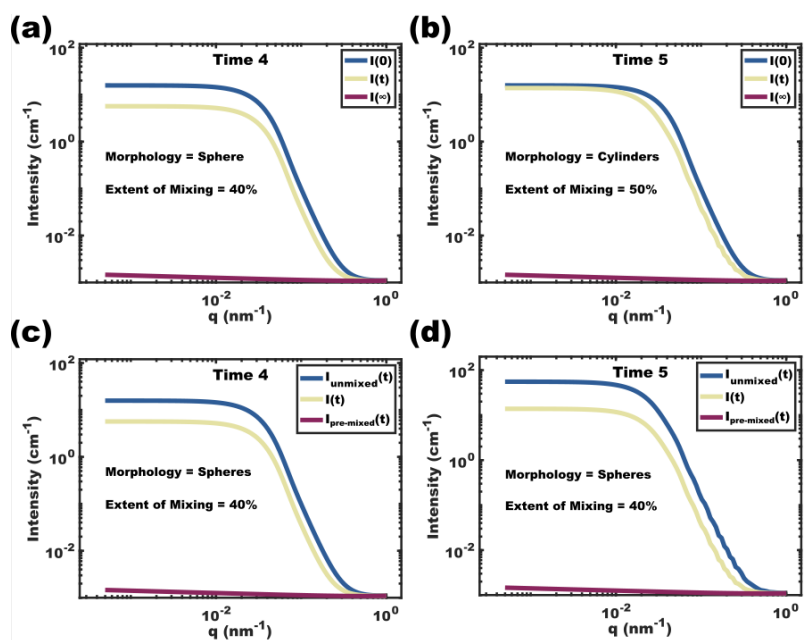

**Figure S3.**  $I$  vs  $q$  scattering curves for scenario 2S. The  $R(t)$  method is appropriate for Time step 4 (a) but reveals a flaw with intersecting curves for time step 5 (b) due to comparison to a reference pattern with a changed morphology. The  $SRR(t)$  method rather uses appropriate reference patterns for both Time step 4 (c) and 5(d).

**Table S1.** Simulation parameters for I(t) values in scenario 1S.

| Time | SASfit Model | Radius* (nm) (X0) | Particle Number Density (N) | Dispersity (S) | Scattering Contrast (eta) |
|------|--------------|-------------------|-----------------------------|----------------|---------------------------|
| 0    | Sphere       | 25                | 1e-30                       | 20             | 1e10                      |
| 1    | Sphere       | 25                | 1e-30                       | 20             | 9e9                       |
| 2    | Sphere       | 25                | 1e-30                       | 20             | 8e9                       |
| 3    | Sphere       | 25                | 1e-30                       | 20             | 7e9                       |
| 4    | Sphere       | 25                | 1e-30                       | 20             | 6e9                       |
| 5    | Sphere       | 50                | 1.25e-31                    | 40             | 5e9                       |
| 6    | Sphere       | 50                | 1.25e-31                    | 40             | 4e9                       |
| 7    | Sphere       | 50                | 1.25e-31                    | 40             | 3e9                       |
| 8    | Sphere       | 50                | 1.25e-31                    | 40             | 2e9                       |
| 9    | Sphere       | 50                | 1.25e-31                    | 40             | 1e9                       |
| 10   | Sphere       | 50                | 1.25e-31                    | 40             | 0                         |

\*Parameter with a gaussian distribution width corresponding to shown Dispersity (S) values.

**Table S2.** Simulation parameters for I<sub>unmixed</sub>(t) values in scenario 1S.

| Time | SASfit Model | Radius* (nm) (X0) | Particle Number Density (N) | Dispersity (S) | Scattering Contrast (eta) |
|------|--------------|-------------------|-----------------------------|----------------|---------------------------|
| 0    | Sphere       | 25                | 1e-30                       | 20             | 1e10                      |
| 1    | Sphere       | 25                | 1e-30                       | 20             | 1e10                      |
| 2    | Sphere       | 25                | 1e-30                       | 20             | 1e10                      |
| 3    | Sphere       | 25                | 1e-30                       | 20             | 1e10                      |
| 4    | Sphere       | 25                | 1e-30                       | 20             | 1e10                      |
| 5    | Sphere       | 50                | 1.25e-31                    | 40             | 1e10                      |
| 6    | Sphere       | 50                | 1.25e-31                    | 40             | 1e10                      |
| 7    | Sphere       | 50                | 1.25e-31                    | 40             | 1e10                      |
| 8    | Sphere       | 50                | 1.25e-31                    | 40             | 1e10                      |
| 9    | Sphere       | 50                | 1.25e-31                    | 40             | 1e10                      |
| 10   | Sphere       | 50                | 1.25e-31                    | 40             | 1e10                      |

\*Parameter with a gaussian distribution width corresponding to shown Dispersity (S) values.

**Table S3.** Simulation parameters for  $I(t)$  values for scenario 2S.

| Time | SASfit Model | Radius* (nm) (X0) | Particle Number Density (N) | Dispersity (S) | Scattering Contrast (eta) | Length |
|------|--------------|-------------------|-----------------------------|----------------|---------------------------|--------|
| 0    | Sphere       | 25                | 1e-30                       | 20             | 1e10                      | N/A    |
| 1    | Sphere       | 25                | 1e-30                       | 20             | 9e9                       | N/A    |
| 2    | Sphere       | 25                | 1e-30                       | 20             | 8e9                       | N/A    |
| 3    | Sphere       | 25                | 1e-30                       | 20             | 7e9                       | N/A    |
| 4    | Sphere       | 25                | 1e-30                       | 20             | 6e9                       | N/A    |
| 5    | Cylinder     | 25                | 1.33e-31                    | 20             | 1e9                       | 200    |
| 6    | Cylinder     | 25                | 1.33e-31                    | 20             | 8e9                       | 200    |
| 7    | Cylinder     | 25                | 1.33e-31                    | 20             | 6e9                       | 200    |
| 8    | Cylinder     | 25                | 1.33e-31                    | 20             | 4e9                       | 200    |
| 9    | Cylinder     | 25                | 1.33e-31                    | 20             | 2e9                       | 200    |
| 10   | Cylinder     | 25                | 1.33e-31                    | 20             | 0                         | 200    |

\*Parameter with a gaussian distribution width corresponding to shown Dispersity (S) values.

**Table S4.** Simulation parameters for  $I_{unmixed}(t)$  values for scenario 2S.

| Time | SASfit Model | Radius* (nm) (X0) | Particle Number Density (N) | Dispersity (S) | Scattering Contrast (eta) | Length |
|------|--------------|-------------------|-----------------------------|----------------|---------------------------|--------|
| 0    | Sphere       | 25                | 1e-30                       | 20             | 1e10                      | N/A    |
| 1    | Sphere       | 25                | 1e-30                       | 20             | 1e10                      | N/A    |
| 2    | Sphere       | 25                | 1e-30                       | 20             | 1e10                      | N/A    |
| 3    | Sphere       | 25                | 1e-30                       | 20             | 1e10                      | N/A    |
| 4    | Sphere       | 25                | 1e-30                       | 20             | 1e10                      | N/A    |
| 5    | Cylinder     | 25                | 1.33e-31                    | 20             | 2e10                      | 200    |
| 6    | Cylinder     | 25                | 1.33e-31                    | 20             | 2e10                      | 200    |
| 7    | Cylinder     | 25                | 1.33e-31                    | 20             | 2e10                      | 200    |
| 8    | Cylinder     | 25                | 1.33e-31                    | 20             | 2e10                      | 200    |
| 9    | Cylinder     | 25                | 1.33e-31                    | 20             | 2e10                      | 200    |
| 10   | Cylinder     | 25                | 1.33e-31                    | 20             | 2e10                      | 200    |

\*Parameter with a gaussian distribution width corresponding to shown Dispersity (S) values.

**Table S5.** Simulation parameters for  $I_{mixed}(t)$  values for scenario 2S.

| Time | SASfit Model | Radius* (nm) (X0) | Particle Number Density (N) | Dispersity (S) | Scattering Contrast (eta) | Length |
|------|--------------|-------------------|-----------------------------|----------------|---------------------------|--------|
| 0    | Sphere       | 25                | 1e-30                       | 20             | 0                         | N/A    |
| 1    | Sphere       | 25                | 1e-30                       | 20             | 0                         | N/A    |
| 2    | Sphere       | 25                | 1e-30                       | 20             | 0                         | N/A    |
| 3    | Sphere       | 25                | 1e-30                       | 20             | 0                         | N/A    |
| 4    | Sphere       | 25                | 1e-30                       | 20             | 0                         | N/A    |
| 5    | Cylinder     | 25                | 1.33e-31                    | 20             | 0                         | 200    |
| 6    | Cylinder     | 25                | 1.33e-31                    | 20             | 0                         | 200    |
| 7    | Cylinder     | 25                | 1.33e-31                    | 20             | 0                         | 200    |
| 8    | Cylinder     | 25                | 1.33e-31                    | 20             | 0                         | 200    |
| 9    | Cylinder     | 25                | 1.33e-31                    | 20             | 0                         | 200    |
| 10   | Cylinder     | 25                | 1.33e-31                    | 20             | 0                         | 200    |

\*Parameter with a gaussian distribution width corresponding to shown Dispersity (S) values

**Table S6.** Simulation parameters for cylinder scenario 3S based on the SASfit model “CYL+Chains(RW)\_Rc.” The initial “Particle Number Density (N)” was scaled for each time step with proportion to the fraction shown in Figure 5b. Unlisted variables were set to 0.

| Particle Number Density (N) | Dispersity (S) | Core Radius (X0)* | Core Block Volume (v core) | Corona Block Volume (v brush) | Scattering Contrast of core (eta core) | Scattering Contrast of corona (eta brush) | Scattering Contrast of solvent (eta solv) | R <sub>g</sub> | d | Cylinder Height (H) (nm) |
|-----------------------------|----------------|-------------------|----------------------------|-------------------------------|----------------------------------------|-------------------------------------------|-------------------------------------------|----------------|---|--------------------------|
| 2e-28                       | 4.0            | 10.0              | 24.31                      | 7.345                         | 2e10                                   | 1.6e10                                    | 1e10                                      | 10             | 1 | 50                       |

\*Parameter with a gaussian distribution width corresponding to shown Dispersity (S) values.

**Table S7.** Simulation parameters for small spheres in scenario 3S based on the SASfit model “BlockCopolymerMicelle.” The initial “Particle Number Density (N)” was scaled for each time step with proportion to the fraction shown in Figure 5b. The initial “Scattering Contrast of Core (eta\_core)” was scaled at each time step with proportion to the extent mixing shown in Figure 5b. Unlisted variables were set to 0.

| Particle Number Density (N) | Dispersity (S) | Aggregation Number (X0)* | Core Block Volume (v core) | Corona Block Volume (v brush) | Scattering Contrast of core (eta core) | Scattering Contrast of corona (eta brush) | Scattering Contrast of solvent (eta solv) | R <sub>g</sub> | d |
|-----------------------------|----------------|--------------------------|----------------------------|-------------------------------|----------------------------------------|-------------------------------------------|-------------------------------------------|----------------|---|
| 7.5e-28                     | 66.93          | 172.31                   | 24.31                      | 7.345                         | 2e10                                   | 1.6e10                                    | 1e10                                      | 10             | 1 |

\*Parameter with a gaussian distribution width corresponding to shown Dispersity (S) values.

**Table S8.** Simulation parameters for large spheres in scenario 3S based on the SASfit model “BlockCopolymerMicelle.” The initial “Particle Number Density (N)” was scaled for each time step with proportion to the fraction shown in Figure 5b. The initial “Scattering Contrast of Core (eta\_core)” was scaled at each time step with proportion to the extent mixing shown in Figure 5b. Unlisted variables were set to 0.

| Particle Number Density (N) | Dispersity (S) | Aggregation Number (X0)* | Core Block Volume (v core) | Corona Block Volume (v brush) | Scattering Contrast of core (eta core) | Scattering Contrast of corona (eta brush) | Scattering Contrast of solvent (eta solv) | R <sub>g</sub> | d |
|-----------------------------|----------------|--------------------------|----------------------------|-------------------------------|----------------------------------------|-------------------------------------------|-------------------------------------------|----------------|---|
| 9.4e-29                     | 551.4          | 1378.5                   | 24.31                      | 7.345                         | 2e10                                   | 1.6e10                                    | 1e10                                      | 10             | 1 |

\*Parameter with a gaussian distribution width corresponding to shown Dispersity (S) values.

**Table S9.** Background parameters for all scenario 3S calculations included the contribution of SASfit model “Dozier Star” with the below parameters.

| N     | Dispersity (S) | Forward Scattering I(0)* | R <sub>g</sub> | Alpha | Nu  | F   |
|-------|----------------|--------------------------|----------------|-------|-----|-----|
| 1e-26 | 150.0          | 200.0                    | 2              | 2e25  | 0.6 | 400 |

\*Parameter with a gaussian distribution width corresponding to shown Dispersity (S) values.
